# Supplementary material
Source: PubMed Central journal article supplement (PMC1738924)
Supplement: jnnpsyc_75_2_209__1.pdf [file jnnpsyc_75_2_209__1.pdf]

## Appendix

### Huntington Study Group investigators and coordinators responsible for data collection

*Albany Medical College, Albany, NY, USA:* Denise L Birdsell, Stewart A Factor Do, Eric Molho MD, Rebecca Rosen.

*Barrow Neurological Institute, Phoenix, AZ, USA:* Matthias Kurth MD PhD, Terri Schwartz MD.

*Baylor College of Medicine, Houston, TX, USA:* Tetsuo Ashizawa MD, Jenny Beach RN, Joseph Jankovic MD.

*Boston University, Boston, MA, USA:* Susan Flater RNC, Denise Petrizzi MS PNP, Marie H Saint-Hilaire MD, Daniel S Sax MD.

*Brown University (Memorial Hosp of RI), Providence, RI, USA:* Hubert Fernandez, MD, Joseph H Friedman MD, Margaret Lannon RN MS.

*Children's Hospital of Alabama, Birmingham, AL, USA:* Leon Dure MD, Jane Lane RN BSN.

*Colorado Neurological Institute, Englewood, CO, USA:* Jonelle Adams, Lauren Seeberger MD.

*Columbia-Presbyterian Medical Center, New York, NY, USA:* Karen Anderson MD, Jose Beltre BA, Leona Borchert MD, Sylvain Chouinard MD, Elan Louis MD, Karen Marder MD, Carol Moskowitz RN, Carmen Polanco-Logo BA, Rachael Saunders Pullman MD, Ivan Simonetti BA, Stuart Taylor MD, Naomi Zubin RN BSN;

*Emory University School of Medicine, Atlanta, GA, USA:* Angela Ashley, Alexander Auchus MD, Timothy Greenamyre MD, Steven Hersch MD, Randi Jones PhD, David Olson MD, Thyagarajan Subramanian.

*Hereditary Neurological Disease Centre (HNDC), Wichita, KA, USA:* William M Mallonee MD, David Palmer MD, Greg Suter BA.

*Hôpital Henri Mondor, Creteil, France:* Anne-Catherine Bachoud-Levi, Marc Peschanski MD PhD.

*Hotel-Dieu Hôpital-CHUM, France:* Sylvain Chouinard MD, Brigitte Rioux.

*Indiana University School of Medicine, Indianapolis, IN, USA:* Kathy Fleming MS, Jackie Gray, Cindy Hunter MS, Nanette Mercado Jessup PhD, Kimberly Quaid PhD, Eric Siemers MD, Julie Stout PhD, Joanne Wojcieszek MD.

*Institute for Neurodegenerative Disorders, New Haven, CT, USA:* Karen Caplan MSW, Janet Cellar RN, Danna Jennings MD, Kenneth Marek MD.

*Johns Hopkins University, Baltimore, MD, USA:* Frederick Bylsma PhD, Ted Dawson MD PhD, Elizabeth Leritz BS, Katrina Ott, Neal Ranen MD, Adam Rosenblatt MD, Christopher Ross MD PhD, Meeia Sherr RN BSN, Barnett Shpritz MS, Candace Young RN BSN.

*Karolinska Hospital, Stockholm, Sweden:* Anders Lundin MD.

*Leiden University Medical Center, Leiden, Netherlands:* Raymund Ac Roos MD DSC, Jeroen P P Van Vugt MD.

*Massachusetts General Hospital, Boston, MA, USA:* Jang-Ho John Cha MD PhD, Merit E Cudkowicz MD, Julie Kerner, Walter Koroshetz MD, John Penney MD, Diana Rosas MD, Greg Rudolf, Patricia Seuffert, Paula Sexton BA CRA, Janet Sherman PhD, Leslie Shinobu MD PhD, Colleen Skeuse BA, Steven Solano BA, Florinda Sullivan BSN Crmt, Anne Young MD PhD. Mayo Clinic, Scottsdale, AZ: Charles Adler MD PhD, John Caviness MD, Cindy Lied RN, Stephanie Newman RN, Cynthia Reiners, RN, Kristi Wetjen.

*North Shore University Hospital, Manhasset, NY, USA:* Angelo Antonini MD, Hillary Clarke MBBS, Jennifer Mazurkiewicz BA.

*Ohio State University, Columbus, OH, USA:* Cori Baic BS, Sandra Kostyk MD PhD, J Philip Miller Ab, Carson Reider MS, Jason Schnetzler, Carolyn Weeks MT (ASCP).

*Royal Brisbane Hospital, Brisbane, Australia:* Linda Gilliland MS RN, Thomas Holdich MBBS MFPM, Cecilie Lander MD, Joan M Lawrence Am MD BS.

*Rush-Presbyterian-St. Luke's Medical Center, Chicago, IL, USA:* Jeana Jaglin RN Ccr, Kathleen Shannon MD.

*The Centre for Addiction and Mental Health, Markham, Ontario, Canada:* Catherine Brown RN MSCN, Jill Burkholder, Mark Guttman MD, Sandra Russell BSW, Dwight Stewart MD, Jackie Thomson RN.

*UMDNJ, New Brunswick, NJ, USA:* Kathleen Francis MD, Kim Lane, Kathy Lawler, Gerald D Podskalny DO, Allen Rubin MD, Rose Schwartz RN, Thomas Zimmerman.

*University of Washington and VA Puget Sound Health Care System, Seattle, WA, USA:* Thomas Bird MD, Robert Burke MD, Hillary Lipe ARNP.

*Universitaetsklinik Fur Neurologie, Innsbruck, Austria:* Elisabeth Brandauer MD, Gregor Wenning MD.

*University Hospitals of Cleveland, Cleveland, OH, USA:* R Stanley Burns MD, David E Riley MD.

*University of Alberta, Edmonton, AL, Canada:* Wayne Martin MD, Marguerite Wieler BSC PT.

*University of British Columbia, Vancouver, BC, Canada:* Elisabeth Almqvist RN PhD, Elizabeth Berry-Kravis MD PhD, Susan Creighton MS CGC, Joji Decolongon MSc, Suzanne Flater, Alex D Goumeniouk MD, Michael Hayden MD PhD, Thomas Henry MD, Pardeep Kaurah, Blair Leavitt MD, Vesna Popovska MD, Lynn Raymond MD PhD, Gina Rohs, Carmen Roig BSN RN, Susan Schwartz, Karen Sedun, Jane Spurrier-Brock, A I Stoessl MD.

*University of Calgary, Calgary, AB, Canada:* Susan Cleary BSN, Carol Demong RN, Mary Lou Klimek RN BN MA, Anne Louise Lafontaine MD, Carol Pantella RN, Ranjit Ranaway MD, Gina Rohs, Oksana Suchowersky MD.

*University of California Davis, Davis, CA, USA:* Jonelle Adams, Ruth Cummings RN MS Ccrn, Terry Tempkin RNC Msn, Vicki Wheelock MD.

*University of California Los Angeles, Los Angeles, CA, USA:* Laurie Carr BS, Dan Geschwind MD PhD, Johanna Jen, Susan Perlman MD.

*University of California San Francisco, San Francisco, CA, USA:* Frank Longo MD, Michelle Tisi BS BA, John Walker PhD, Andrea Zanko MS.

*University of California San Diego, San Diego, CA, USA:* Jody Corey-Bloom, MD PhD, Shirley Fenner RN, Guerry M Peavy PhD, Mark Jacobson PhD.

*University of Connecticut, Hartford, CT, USA:* A Wallace Deckel PhD, James D Duffy MD, Mary Jane Fitzpatrick APRN.

*University of Iowa, Iowa City, IA, USA:* Michelle Benjamin BS, Katie Hall BA, Jane Paulsen PhD, Henry Paulson MD, Elizabeth Penziner Ma Ches, Robert L Rodnitzky MD, Laura Stierman BS, Beth Turner, Erica Wagner.

*University of Kansas Medical Center, Kansas City, KS, USA:* Richard Dubinsky MD, Carolyn Gray RN.

*University of Miami, Miami, FL, USA:* Dinorah Bateman RN, Celeste Duddleston RN, Alicia Facca MD, Mariella Fernandez RN BSN, Marian A Perez Aa, Gustavo Rey PhD, Juan Sanchez-Ramos MD, William J Weiner MD.

*University of Michigan, Ann Arbor, MI, USA:* Roger Albin MD, Kristine Wernette RN MS.

*University of Minnesota/Hennepin County Medical Center, Minneapolis, MN, USA:* Elizabeth Krech, Martha Nance MD, Dawn Radtke RN.

*University of Rochester, Rochester, NY, USA:* David Abwender, Karen Blindauer MD, Peter Como PhD, Cheryl Deeley MS RNC, Antonelle Demarcaida, Andrew Feigin MD, Irenita Gardiner RN, Joshua Goldstein, Charlyne Hickey RN MS, Donald S Higgins Jr MD, Penelope Hogarth MD, Elise Kayson MS RNC, Karl Kiebert MD, Frederick Marshall MD, Donna Palumbo PhD, Nancy Pearson RN MS, Irene Richard MD, Giovanni Schifitto MD, Ira Shoulson MD, Andrew Siderowf MD, David Song MD, Kimberly Trinidad, MD, Lin Zhang MD PhD, Carol Zimmerman RN.

*University of South Florida, Tampa, FL, USA:* Holly Delgado RN, Robert Hauser MD, Audrey Walker RN.

*University of Virginia, Charlottesville, VA, USA:* Anne Giles, Madaline Harrison MD, Barbara Haskins MD, Carol Manning PhD.

*Universita Cattolica del Sacro Cuore, Rome, Italy: Alberto Albanese MD.*

*Wake Forest University School of Medicine, Winston Salem, NC, USA: Vicki Hunt RN, Francis Walker MD.*

*Washington University, St Louis, MO, USA: Kevin Black MD, Tammy Hershey PhD, Brad Racette MD.*

*Westmead Hospital, Sydney, Australia: Maria Anvret, Bernadette Bibb, Phillipa Hedges, Neil Mahant, Fracp, Elizabeth McCusker MD, Samantha Pearce, Ronald Trent MD.*

*Winnipeg Clinic, Winnipeg, MB, Canada: Douglas E Hobson MD, Shaun Hobson RN.*
